# Supplementary material for: Development of a yeast whole-cell biocatalyst for MHET conversion into terephthalic acid and ethylene glycol
Source: Springer Nature journal article supplement (doi:10.1186/s12934-022-02007-9), 2022-12-31
Supplement: MOESM1 [file 12934_2022_2007_MOESM1_ESM.pdf]

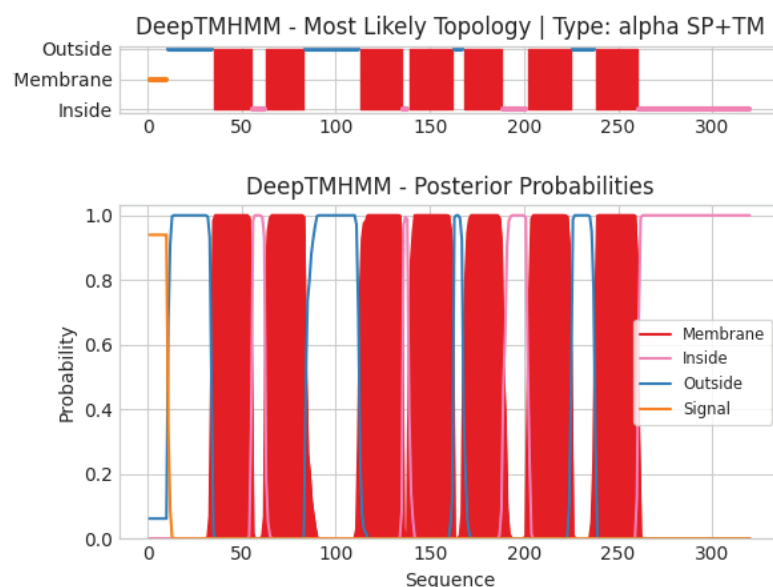

**Figure S1. Mrh1 transmembrane topology prediction.** Results obtained from the DeepTMHMM application ([dtu.biolib.com/DeepTMHMM](https://dtu.biolib.com/DeepTMHMM), accessed September 28, 2022) for the Mrh1 protein. Top panel: protein domain orientation relative to the inner and outer part of the cytoplasmic membrane. Bottom panel: probability associated with the inner and outer orientation for each protein domain.

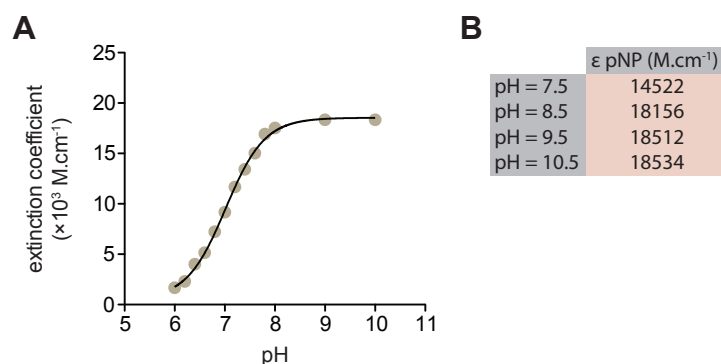

**Figure S2. para-nitrophenol extinction coefficient modeling.** **A.** Extinction coefficient curve fitting. Discreet extinction coefficient data from Biggs 1954 [50] was used to model para-nitrophenol extinction coefficients between pH 6 and 10. **B.** Extinction coefficients for para-nitrophenol at the indicated pH used in this study based on modelling shown in A.

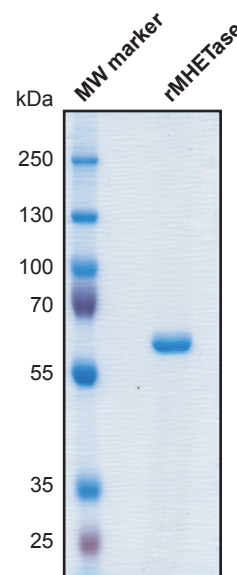

**Figure S3. Purified recombinant MHETase.** Molecular weights of reference markers in kDa are indicated
